# Supplementary material
Source: publisher site journal article supplement (https://www.dovepress.com/article/557302)
Supplement: Supplementary file 1 [file 557302%20Revised%20Supplementary%20Material.pdf]

**Supplementary Material 1**  
**Full Questionnaire Used in the Study**

**1. Gender:**

Male  Female

**2. Age:** \_\_\_\_\_ years

**3. Specialization:**

Resident  Specialist

**4. Professional experience:**

under 5 years  5–10 years  10–20 years  over 20 years

**5. Workplace:**

University clinic  Private hospital/center  Outpatient clinic  Medical center  Private practice

**6. Practice location:**

Regional center  Small town  Village

**7. Does your practice have an OCT device?**

Yes  No

**8. Do you consider yourself well-informed about the current applications of AI in medicine?**

Yes  Partially  No

**9. Are you aware whether the OCT device you use includes AI-based algorithms?**

Yes  No  Not sure

**10. Have you used automated programs for OCT image analysis?**

Yes  No  Not sure

**11. Do you think the use of AI increases the objectivity of image interpretation?**

Yes  Partially  No

**12. How would you rate your personal knowledge of AI in ophthalmology?**

Good  Moderate  Superficial  None  Cannot assess

**13. Do you trust AI-generated suggestions for diagnosing eye diseases?**

Fully trust  Rather trust  Not sure  Rather distrust  Do not trust at all

**14. Do you think AI is useful for the diagnosis and monitoring of glaucoma?**

Yes  Partially  No  Cannot assess

**15. Would you trust AI in making a diagnosis of glaucoma?**

Yes  Rather yes  Rather not  No

**16. Would you trust AI in recommending treatment for glaucoma?**

Yes  Rather yes  Rather not  No

**17. When do you think AI will have a significant impact on glaucoma care?**

In 2–3 years  In 5 years  In 10 years  In 20 years  Never

**18. Do you believe AI will replace physicians in the future?**

Strongly agree  Rather agree  Rather disagree  Strongly disagree

**19. In which aspects of glaucoma diagnostics can AI be helpful? (multiple answers possible)**

Screening  Diagnosis confirmation  Monitoring progression  Not helpful

**20. Is AI more appropriate for:**

Mass screening  Highly specialized diagnostics

**21. AI tools should be used:**

Independently  Only by ophthalmologists  By any medical professional after training

**22. Do you think additional training in AI use in ophthalmology is necessary?**

Yes  No

**23. In your opinion, what are the potential benefits of AI in ophthalmology? (open-ended)**

**24. In your opinion, what are the main risks and challenges of AI in ophthalmology? (open-ended)**

**25. What conditions must be met for AI to be effectively implemented in your practice? (open-ended)**
